# Supplementary material for: Analysis of the miR-34 family functions in breast cancer reveals annotation error of miR-34b
Source: PubMed Central journal article supplement (PMC5573726; doi:10.1038/s41598-017-10189-1), 2017-08-28
Supplement: 41598_2017_10189_MOESM4_ESM.pdf [file 41598_2017_10189_MOESM4_ESM.pdf]

# Analysis of the miR-34 family functions in breast cancer reveals annotation error of miR-34b

Authors:

Engkvist ME<sup>1</sup>, Stratford EW<sup>1</sup>, Lorenz S<sup>1,2</sup>, Meza-Zepeda LA<sup>1,2</sup>, Myklebost O<sup>1,3\*</sup>, Munthe E<sup>1\*</sup>

\*shared last authorship

<sup>1</sup>Department of Tumour Biology, Institute for Cancer Research, Oslo University Hospital

<sup>2</sup>Department of Core Facilities, Institute for Cancer Research, Oslo University Hospital

<sup>3</sup>Department of Clinical Science, University of Bergen



gugcucgguuuguaggcagugucauuagcugauuuacugugggguuacaaucacuaacuccacugccaucaaaacaaggcac

|                                  |     |   |     |
|----------------------------------|-----|---|-----|
| .....uagCcagugucauuagcug.....    | 6   | 1 | seq |
| .....uaggcUgugucauuagcug.....    | 4   | 1 | seq |
| .....uaggcCgugucauuagcug.....    | 4   | 1 | seq |
| .....uaggcagGgucuuagcug.....     | 4   | 1 | seq |
| .....Caggcagugucauuagcug.....    | 1   | 1 | seq |
| .....uaggcagugCcauuagcug.....    | 1   | 1 | seq |
| .....uaggcagugUauuagcug.....     | 3   | 1 | seq |
| .....uaggcagugucauuagcAg.....    | 1   | 1 | seq |
| .....uaggcagugucauGagcug.....    | 4   | 1 | seq |
| .....uaggcagugucauGagcug.....    | 3   | 1 | seq |
| .....uaggcagugucauuagcU.....     | 4   | 1 | seq |
| .....uaggcagugucauuAacug.....    | 1   | 1 | seq |
| .....uaggcagugucaCuagcug.....    | 2   | 1 | seq |
| .....uaggcagugucaGuagcug.....    | 4   | 1 | seq |
| .....uaggcagCgucuuagcug.....     | 1   | 1 | seq |
| .....Gaggcagugucauuagcug.....    | 8   | 1 | seq |
| .....uaggcagugGcauuagcuga.....   | 1   | 1 | seq |
| .....uaggcagugucauGagcuga.....   | 2   | 1 | seq |
| .....uaggUagugucauuagcuga.....   | 3   | 1 | seq |
| .....uaggcagugucauuagcCga.....   | 1   | 1 | seq |
| .....uaggcagugucUuuagcuga.....   | 3   | 1 | seq |
| .....uaggcagugucaAuagcuga.....   | 1   | 1 | seq |
| .....uaggcagugucaGuagcuga.....   | 1   | 1 | seq |
| .....uaggcAUugucauuagcuga.....   | 1   | 1 | seq |
| .....uaggcagugucauuagcuga.....   | 679 | 0 | seq |
| .....uaggcagugucauuagcugU.....   | 91  | 1 | seq |
| .....uagCcagugucauuagcuga.....   | 2   | 1 | seq |
| .....Aaggcagugucauuagcuga.....   | 3   | 1 | seq |
| .....uaggcCgugucauuagcuga.....   | 1   | 1 | seq |
| .....uaggcagugucauAagcuga.....   | 3   | 1 | seq |
| .....uagUcagugucauuagcuga.....   | 52  | 1 | seq |
| .....uaggcagugucauuagUuga.....   | 2   | 1 | seq |
| .....uaggcagugucauuagcuUa.....   | 7   | 1 | seq |
| .....uUggcagugucauuagcuga.....   | 2   | 1 | seq |
| .....uaggcagugucauuGgcuga.....   | 2   | 1 | seq |
| .....uaggcagugucaCuagcuga.....   | 2   | 1 | seq |
| .....uaggcaguUucauuagcuga.....   | 1   | 1 | seq |
| .....uaggcagugucauuUcuga.....    | 2   | 1 | seq |
| .....uaUgcagugucauuagcuga.....   | 5   | 1 | seq |
| .....uaggcagugucauuagcuUau.....  | 2   | 1 | seq |
| .....uaggcagugucauuagcuAau.....  | 1   | 1 | seq |
| .....uaggcagugucauuagcugaC.....  | 18  | 1 | seq |
| .....uaggcagugucauuagcugGu.....  | 1   | 1 | seq |
| .....uaggcagugucauuagcugaA.....  | 2   | 1 | seq |
| .....uagUcagugucauuagcugau.....  | 6   | 1 | seq |
| .....uaggcagugucauuagcugUu.....  | 456 | 1 | seq |
| .....uaggcagugucauuagcugau.....  | 55  | 0 | seq |
| .....uaggcagugucauGagcugauu..... | 1   | 1 | seq |
| .....uaggcUgugucauuagcugauu..... | 1   | 1 | seq |
| .....uaggcagugucauuagcugauu..... | 647 | 0 | seq |
| .....uaggcagugucauuagcugaAu..... | 1   | 1 | seq |
| .....uaggcagugucUuuagcugauu..... | 2   | 1 | seq |
| .....uaggcagugucauuagUugauu..... | 15  | 1 | seq |
| .....uaggcagugucauuGgcugauu..... | 2   | 1 | seq |
| .....uaggcagugucauuUcugauu.....  | 11  | 1 | seq |
| .....uaggcagugucaGuagcugauu..... | 1   | 1 | seq |
| .....uaUgcagugucauuagcugauu..... | 6   | 1 | seq |
| .....uaggcagugucauuagcGgauu..... | 2   | 1 | seq |
| .....uaggcagugucauuagcugUuu..... | 13  | 1 | seq |
| .....uaggcagugUauuagcugauu.....  | 1   | 1 | seq |
| .....uUggcagugucauuagcugauu..... | 3   | 1 | seq |
| .....uagUcagugucauuagcugauu..... | 58  | 1 | seq |
| .....uaggcagugucauuagcugaCu..... | 77  | 1 | seq |
| .....uaggcagugucauGagcugauu..... | 1   | 1 | seq |
| .....uagAcagugucauuagcugauu..... | 2   | 1 | seq |
| .....uaggcagugucauuagcugauG..... | 23  | 1 | seq |
| .....uaggcagugucauuagGugauu..... | 1   | 1 | seq |
| .....uaggcagUucauuagcugauu.....  | 2   | 1 | seq |
| .....uaggUagugucauuagcugauu..... | 1   | 1 | seq |

gugcucgguuuagggcagugucuuagcugauugucuguggguuacaaucacuaacuccacugccaucaaaacaaggcac

|                                   |      |   |     |
|-----------------------------------|------|---|-----|
| .....uaggcagugucuuagcugauu.....   | 4    | 1 | seq |
| .....uaggGagugucuuagcugauu.....   | 3    | 1 | seq |
| .....uaggcagugucuuagcugauA.....   | 24   | 1 | seq |
| .....uaggcagGgucuuagcugauu.....   | 2    | 1 | seq |
| .....uaggcagugucuuagcuUauu.....   | 3    | 1 | seq |
| .....uagCcagugucuuagcugauu.....   | 1    | 1 | seq |
| .....uaggcaUugucuuagcugauu.....   | 4    | 1 | seq |
| .....uaggcagugucuuagcugauug.....  | 3541 | 0 | seq |
| .....uaggcagugucuuagGugauug.....  | 10   | 1 | seq |
| .....uaggcagugucUuuagcugauug..... | 12   | 1 | seq |
| .....uaggcagGgucuuagcugauug.....  | 3    | 1 | seq |
| .....uaggcagugucuuagcugauug.....  | 6    | 1 | seq |
| .....uaggcagugucuuagcugauuC.....  | 24   | 1 | seq |
| .....uaggcagugucUuuagcugauug..... | 1    | 1 | seq |
| .....uaggcagugucuuagcugaAuu.....  | 1    | 1 | seq |
| .....uaggcagugucuuUcugauug.....   | 18   | 1 | seq |
| .....uaggcagugucuuagcugauCg.....  | 3    | 1 | seq |
| .....uaggcagugucuuagcugauuU.....  | 543  | 1 | seq |
| .....uaggcagugucuuagcugauAag..... | 1    | 1 | seq |
| .....uaggUagugucuuagcugauug.....  | 10   | 1 | seq |
| .....uaggcagCgucuuagcugauug.....  | 1    | 1 | seq |
| .....uaggcagugucuuagAugauug.....  | 1    | 1 | seq |
| .....uaggcagugucuuagcugauuA.....  | 95   | 1 | seq |
| .....uaggcagugucuuUgcugauug.....  | 2    | 1 | seq |
| .....uagCcagugucuuagcugauug.....  | 11   | 1 | seq |
| .....uGggcagugucuuagcugauug.....  | 1    | 1 | seq |
| .....uaggcCgugucuuagcugauug.....  | 3    | 1 | seq |
| .....uaggcagugucuuGgcugauug.....  | 2    | 1 | seq |
| .....uaggcaguAucuuagcugauug.....  | 1    | 1 | seq |
| .....uaUgcagugucuuagcugauug.....  | 17   | 1 | seq |
| .....uaggcaguguuUuuagcugauug..... | 5    | 1 | seq |
| .....uaggcaguuUucuuagcugauug..... | 15   | 1 | seq |
| .....Caggcagugucuuagcugauug.....  | 1    | 1 | seq |
| .....uaggcagugucuuagcuCauug.....  | 1    | 1 | seq |
| .....uaggGagugucuuagcugauug.....  | 2    | 1 | seq |
| .....uaggcUgugucuuagcugauug.....  | 2    | 1 | seq |
| .....uaggcagugGcuuagcugauug.....  | 1    | 1 | seq |
| .....uaggcagugucuuagcugauGg.....  | 4    | 1 | seq |
| .....uaggcagugucuuagcugauug.....  | 3    | 1 | seq |
| .....uagAcagugucuuagcugauug.....  | 2    | 1 | seq |
| .....uaggcagugucuuagcAgauug.....  | 3    | 1 | seq |
| .....uaggcagugucuuagcugauug.....  | 6    | 1 | seq |
| .....uaggcaUugucuuagcugauug.....  | 5    | 1 | seq |
| .....uaCgcagugucuuagcugauug.....  | 1    | 1 | seq |
| .....uagUcagugucuuagcugauug.....  | 262  | 1 | seq |
| .....uaggcagugucuuagcCgauug.....  | 5    | 1 | seq |
| .....uaggcagugucuuagcugUuug.....  | 17   | 1 | seq |
| .....uUggcagugucuuagcugauug.....  | 9    | 1 | seq |
| .....uaggcagugucUuuagcugauug..... | 1    | 1 | seq |
| .....uaggcagugucuuagUgauug.....   | 34   | 1 | seq |
| .....Gaggcagugucuuagcugauug.....  | 8    | 1 | seq |
| .....uaggcagAgucuuagcugauug.....  | 3    | 1 | seq |
| .....uaggcagugucuuagcGgauug.....  | 1    | 1 | seq |
| .....uaggcagugucuuagcugauug.....  | 1    | 1 | seq |
| .....uaggcagugucuuagcugaCug.....  | 1    | 1 | seq |
| .....uaggcagugCcauuagcugauug..... | 2    | 1 | seq |
| .....uaggcagugucuuagcuUauug.....  | 8    | 1 | seq |
| .....uaggcagugucuuCagcugauug..... | 3    | 1 | seq |
| .....uaggcaguuUucuuagcugauug..... | 14   | 1 | seq |
| .....uaAgcagugucuuagcugauug.....  | 1    | 1 | seq |
| .....uaggcaguuAucuuagcugauug..... | 4    | 1 | seq |
| .....uaggcagugucuuagcGgauug.....  | 2    | 1 | seq |
| .....Gaggcagugucuuagcugauug.....  | 9    | 1 | seq |
| .....uaggcagugCcauuagcugauug..... | 1    | 1 | seq |
| .....uaggcagGgucuuagcugauug.....  | 3    | 1 | seq |
| .....uaggcCgugucuuagcugauug.....  | 1    | 1 | seq |
| .....uaggcagugGcuuagcugauug.....  | 1    | 1 | seq |
| .....uaggcagugucuuagcugauuUu..... | 68   | 1 | seq |
| .....uaggcaguguuUuuagcugauug..... | 7    | 1 | seq |

gugcucgguuuguaggcagugucauuagcugauuguacuguggguuacaaucacuaacuccacugccaucaaaacaaggcac

|                                       |      |   |     |
|---------------------------------------|------|---|-----|
| .....uaggcagugucauuGgcugauugu.....    | 3    | 1 | seq |
| .....Aaggcagugucauuagcugauugu.....    | 2    | 1 | seq |
| .....uaggcagugucauuUgcugauugu.....    | 4    | 1 | seq |
| .....uaUgcagugucauuagcugauugu.....    | 21   | 1 | seq |
| .....uaggcagugucauuagcugauuAgu.....   | 2    | 1 | seq |
| .....uaggcagugucauuagcugauuAu.....    | 3    | 1 | seq |
| .....uaggUagugucauuagcugauugu.....    | 6    | 1 | seq |
| .....uaggcagugucauuagcugaAugu.....    | 1    | 1 | seq |
| .....uaggcagugucauuagcugauuA.....     | 129  | 1 | seq |
| .....uagAcagugucauuagcugauugu.....    | 4    | 1 | seq |
| .....uUggcagugucauuagcugauugu.....    | 11   | 1 | seq |
| .....uaggcagugucauuagcugauuGgu.....   | 1    | 1 | seq |
| .....uagUcagugucauuagcugauugu.....    | 273  | 1 | seq |
| .....uaggcagugucauuUcugauugu.....     | 3    | 1 | seq |
| .....uaggcagugucauuagcCgauugu.....    | 1    | 1 | seq |
| .....uaggcagugucauuagcuUauugu.....    | 5    | 1 | seq |
| .....uaggcagugAcuuagcugauugu.....     | 2    | 1 | seq |
| .....uaggcaUugucauuagcugauugu.....    | 4    | 1 | seq |
| .....uaggcagugucaGuagcugauugu.....    | 1    | 1 | seq |
| .....uaggcagugucauuagcugauuCu.....    | 17   | 1 | seq |
| .....uaggcagugucaCuagcugauugu.....    | 4    | 1 | seq |
| .....uaggcagAgucauuagcugauugu.....    | 4    | 1 | seq |
| .....uaggcagugucauuagcugaCugu.....    | 4    | 1 | seq |
| .....uaggcagugucauuagcugUuugu.....    | 10   | 1 | seq |
| .....uaggcagugucauuagcugauuG.....     | 57   | 1 | seq |
| .....Caggcagugucauuagcugauugu.....    | 1    | 1 | seq |
| .....uaggcagCgucuuagcugauugu.....     | 1    | 1 | seq |
| .....uaggcUgugucauuagcugauugu.....    | 3    | 1 | seq |
| .....uaggcagugucauuagcAuuugu.....     | 1    | 1 | seq |
| .....uaggcagugucauuagcugauugu.....    | 2832 | 0 | seq |
| .....uaggcagugucauuagcugauuG.....     | 6    | 1 | seq |
| .....uaggAagugucauuagcugauugu.....    | 1    | 1 | seq |
| .....uaggcagugucauGagcugauugu.....    | 1    | 1 | seq |
| .....uaggcagugucGuuagcugauugu.....    | 1    | 1 | seq |
| .....uaggcagugucauuagUugauugu.....    | 21   | 1 | seq |
| .....uaggcagugucauGagcugauugu.....    | 4    | 1 | seq |
| .....uagCcagugucauuagcugauugu.....    | 6    | 1 | seq |
| .....uaggcagugucauuagcugauugu.....    | 10   | 1 | seq |
| .....uaggcagugucUuuagcugauugu.....    | 15   | 1 | seq |
| .....uaggcagugucauuagcugauCgu.....    | 1    | 1 | seq |
| .....uaggcagugucauuagcugauuG.....     | 1    | 1 | seq |
| .....uagAcagugucauuagcugauugua.....   | 1    | 1 | seq |
| .....uagUcagugucauuagcugauugua.....   | 24   | 1 | seq |
| .....uaggcagugucauuagUugauugua.....   | 1    | 1 | seq |
| .....uaggcagugucauuagcugauuGga.....   | 1    | 1 | seq |
| .....uaggcagugucauuagcugauugua.....   | 195  | 0 | seq |
| .....uaggcagugucauuUgcugauugua.....   | 1    | 1 | seq |
| .....uaggcagugucauuagcugauuGaa.....   | 4    | 1 | seq |
| .....uaggcagugucauuagcugauuUua.....   | 2    | 1 | seq |
| .....uaggcagugucauuagcUauugua.....    | 1    | 1 | seq |
| .....uaggcagugucauuagcugauuGuC.....   | 27   | 1 | seq |
| .....uaggcaUugucauuagcugauugua.....   | 1    | 1 | seq |
| .....uaggcagugucauuagcugauuGuU.....   | 470  | 1 | seq |
| .....uaggcagugucauuUcugauugua.....    | 1    | 1 | seq |
| .....uaggcagugucauuagcugauuGaa.....   | 3    | 1 | seq |
| .....uaggcagugucauuagcugauuGAc.....   | 3    | 1 | seq |
| .....uaggcagugucauuagcugauuGuaU.....  | 4    | 1 | seq |
| .....uaggcagugucauuagcugauuGuaG.....  | 1    | 1 | seq |
| .....uaggcagugucauuagcugauuGuaUu..... | 2    | 1 | seq |
| .....uaggcagugucauuagcugauuGaaCu..... | 1    | 1 | seq |
| .....uaggcagugucauuagcugauuGuUcu..... | 1    | 1 | seq |
| .....aggcagugucaGuagcug.....          | 1    | 1 | seq |
| .....aggcagugucauuagcuC.....          | 1    | 1 | seq |
| .....aggcagugucauuagcug.....          | 215  | 0 | seq |
| .....Uggcagugucauuagcug.....          | 2    | 1 | seq |
| .....aggcagugucauuUgcug.....          | 1    | 1 | seq |
| .....aggcagugucUuuagcuga.....         | 1    | 1 | seq |
| .....aggcagugucauuGgcuga.....         | 1    | 1 | seq |
| .....aggcagugucauuagcuga.....         | 26   | 0 | seq |

gugcucgguuuagaggcagugucuuagcugauugucuguggguuacaaucacuaacuccacugccaucaaaacaaggcac

|                                     |     |   |     |
|-------------------------------------|-----|---|-----|
| ..... aggcagugucuuagcugau.....      | 2   | 0 | seq |
| ..... aggcagugucuuagcugUu.....      | 10  | 1 | seq |
| ..... aggcUgugucuuagcugauu.....     | 1   | 1 | seq |
| ..... aggGagugucuuagcugauu.....     | 1   | 1 | seq |
| ..... aggcagugucuuagcugaCu.....     | 3   | 1 | seq |
| ..... aggcagugCcauuagcugauu.....    | 1   | 1 | seq |
| ..... aggcagugucuuagcugauu.....     | 12  | 0 | seq |
| ..... aggUagugucuuagcugauug.....    | 2   | 1 | seq |
| ..... agUcagugucuuagcugauug.....    | 2   | 1 | seq |
| ..... aggcagugGcauuagcugauug.....   | 1   | 1 | seq |
| ..... aUgcagugucuuagcugauug.....    | 4   | 1 | seq |
| ..... aggcagugucuuagcugaAu.....     | 1   | 1 | seq |
| ..... Gggcagugucuuagcugauug.....    | 1   | 1 | seq |
| ..... aggGagugucuuagcugauug.....    | 1   | 1 | seq |
| ..... aggcagugucuuagcugauuA.....    | 1   | 1 | seq |
| ..... aggcagUucauuagcugauug.....    | 1   | 1 | seq |
| ..... aggcagugucuuagcugauuU.....    | 3   | 1 | seq |
| ..... aggcUgugucuuagcugauug.....    | 2   | 1 | seq |
| ..... aggcagAgucuuagcugauug.....    | 1   | 1 | seq |
| ..... aggcagugucuuUgcugauug.....    | 2   | 1 | seq |
| ..... aggcagCgucuuagcugauug.....    | 1   | 1 | seq |
| ..... aggcagugucuuagcugauug.....    | 174 | 0 | seq |
| ..... Uggcagugucuuagcugauug.....    | 1   | 1 | seq |
| ..... aggcagugucuuagcGgauug.....    | 1   | 1 | seq |
| ..... aggcagugucuuagcCgauug.....    | 1   | 1 | seq |
| ..... aggcagugucuuagcugauugA.....   | 3   | 1 | seq |
| ..... aggcagugucuuagcugauugC.....   | 2   | 1 | seq |
| ..... aggcagugucuuagcugauuCu.....   | 1   | 1 | seq |
| ..... aggcagugucuuagcugUuug.....    | 1   | 1 | seq |
| ..... agUcagugucuuagcugauug.....    | 1   | 1 | seq |
| ..... aggcagugGauuagcugauug.....    | 1   | 1 | seq |
| ..... aggUagugucuuagcugauug.....    | 1   | 1 | seq |
| ..... aggcagugucuuagcugauug.....    | 48  | 0 | seq |
| ..... aggcagugucuuagcugauugC.....   | 2   | 1 | seq |
| ..... aggcagugucuuagUgauug.....     | 1   | 1 | seq |
| ..... aggcagugucuuagcugauugU.....   | 20  | 1 | seq |
| ..... aggcagugucuuagcugauugua.....  | 8   | 0 | seq |
| ..... aggcagugucuuagcugauuguaU..... | 1   | 1 | seq |
| ..... ggcagugucuuagcuga.....        | 4   | 0 | seq |
| ..... ggcagUucauuagcuga.....        | 1   | 1 | seq |
| ..... ggcagugucuuagcugUu.....       | 1   | 1 | seq |
| ..... ggcagugucuuagcugaCu.....      | 1   | 1 | seq |
| ..... ggcagugucuuagcugauu.....      | 2   | 0 | seq |
| ..... ggcagugucuuagcugaGug.....     | 1   | 1 | seq |
| ..... ggcagugucuuUcugauug.....      | 1   | 1 | seq |
| ..... ggcagugucuuagcugauug.....     | 54  | 0 | seq |
| ..... ggcagugucuuagcugauuU.....     | 1   | 1 | seq |
| ..... ggcagugucuuAgcugauug.....     | 1   | 1 | seq |
| ..... ggcGgugucuuagcugauug.....     | 1   | 1 | seq |
| ..... ggcagugucuuagcugaCug.....     | 1   | 1 | seq |
| ..... ggcagugucuuagUgauug.....      | 1   | 1 | seq |
| ..... ggcagugucaGuagcugauug.....    | 1   | 1 | seq |
| ..... ggcagugucuuagcugauug.....     | 10  | 0 | seq |
| ..... ggcagugucuuagcugauugC.....    | 1   | 1 | seq |
| ..... ggcagugucuuagcugauugua.....   | 1   | 0 | seq |
| ..... ggcagugucuuagcugauugC.....    | 1   | 1 | seq |
| ..... gcagugucuuagcuUauug.....      | 1   | 1 | seq |
| ..... gcagugucuuagUgauug.....       | 3   | 1 | seq |
| ..... gcagugucuuUgcugauug.....      | 1   | 1 | seq |
| ..... gcagugucuuagcugUuug.....      | 1   | 1 | seq |
| ..... gcagugucuuagcugauug.....      | 88  | 0 | seq |
| ..... gcaUugucuuagcugauug.....      | 6   | 1 | seq |
| ..... gcagugucuuUcugauug.....       | 1   | 1 | seq |
| ..... gcagugucuuagcugauug.....      | 2   | 0 | seq |
| ..... gcagugucuuagcugauugua.....    | 1   | 0 | seq |
| ..... cagugucuuagcugauu.....        | 3   | 0 | seq |
| ..... cagugucuuagcugauA.....        | 1   | 1 | seq |
| ..... cagugucuuagcugauuU.....       | 1   | 1 | seq |
| ..... cagugucuuagcAgaug.....        | 1   | 1 | seq |

hsa-miR-34b-5p

hsa-miR-34b-3p

gag ucgguuuguaggcagugucauuagcugauuguacuguggugguuacaaucaacuauaccacugccaucaaaa caaggcac

|                                  |    |   |     |
|----------------------------------|----|---|-----|
| .....cagugucauuagcugauug.....    | 38 | 0 | seq |
| .....cagugucauuUcugauug.....     | 1  | 1 | seq |
| .....cagugucauuagcugauugu.....   | 2  | 0 | seq |
| .....agugucauuagcugauuU.....     | 1  | 1 | seq |
| .....agugGcauuagcugauug.....     | 1  | 1 | seq |
| .....agugucauuagcugauug.....     | 18 | 0 | seq |
| .....aguUucauuagcugauug.....     | 2  | 1 | seq |
| .....agugucauuagcugauugA.....    | 1  | 1 | seq |
| .....gugucauuagcugauugu.....     | 1  | 0 | seq |
| .....gugucauuacCugauugu.....     | 1  | 1 | seq |
| .....caucacuaacuccacugccau.....  | 1  | 0 | seq |
| .....aaucacuaacuccacugccauc..... | 3  | 0 | seq |
| .....aaucacuaacuccacugccauU..... | 1  | 1 | seq |
| .....aucacuaacuccacugccauc.....  | 1  | 0 | seq |

### Supplementary data S4: miRDeep analysis of miR-34b sequencing data for MDA-MB-231 cells transfected with annotated miR-34b mimic.

The plot shows the percentage of reads for each individual base in the mature miRNA. The annotated sequences are given in red, and the identified sequences and their number of reads are listed below.

Cell line : MDA-MB-231 cells transfected with Negative control

miRBase precursor : hsa-mir-34b

Total read count : 25

hsa-miR-34b-3p read count : 6

hsa-miR-34b-5p read count : 19

remaining reads : 0

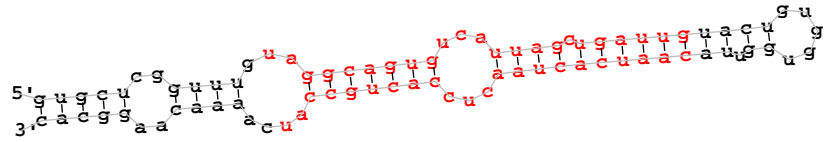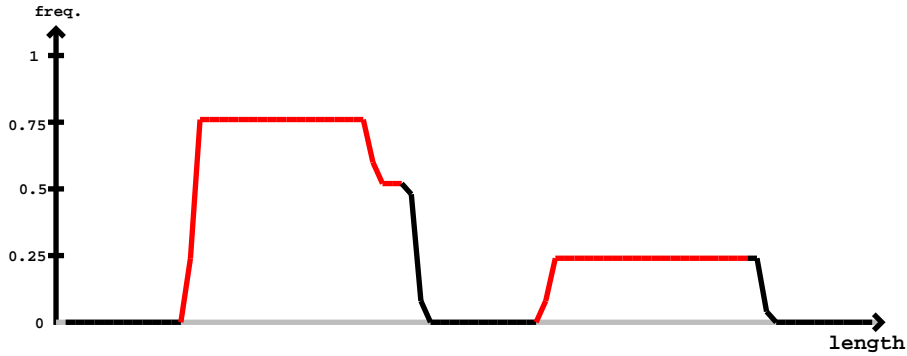

hsa-miR-34b-5p

hsa-miR-34b-3p

| 5' - | gugcucgguuuagggcagugucuuagcugauuguaucuguggguucaaucacuaacuccacugccaucaaaaaaggcac | -3' | exp |       |    |     |
|------|---------------------------------------------------------------------------------|-----|-----|-------|----|-----|
|      | (((((((((....(((.....))))))))))))))))))))))))))))))))))))))))))))))))))))))))   |     |     | reads | mm |     |
|      | .....uaggcagugucuuagcug.....                                                    |     |     | 4     | 0  | seq |
|      | .....uaggcagugucuuagcuga.....                                                   |     |     | 2     | 0  | seq |
|      | .....aggcagugucuuagcugauug.....                                                 |     |     | 1     | 0  | seq |
|      | .....aggcagugucuuagcugauuga.....                                                |     |     | 10    | 0  | seq |
|      | .....aggcagugucuuagcugauugua.....                                               |     |     | 2     | 0  | seq |
|      | .....caucacuaacuccacugccauc.....                                                |     |     | 2     | 0  | seq |
|      | .....aucacuaacuccacugccauc.....                                                 |     |     | 3     | 0  | seq |
|      | .....aucacuaacuccacugccaucU.....                                                |     |     | 1     | 1  | seq |





Cell line : IOR-MOS  
 miRBase precursor : hsa-mir-34b  
 Total read count : 703  
 hsa-miR-34b-3p read count : 100  
 hsa-miR-34b-5p read count : 603  
 remaining reads : 0

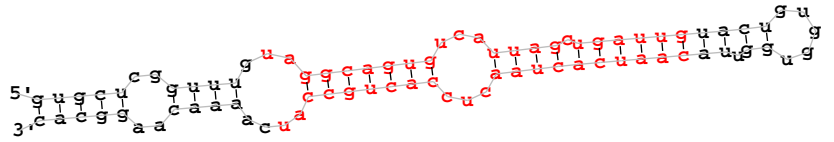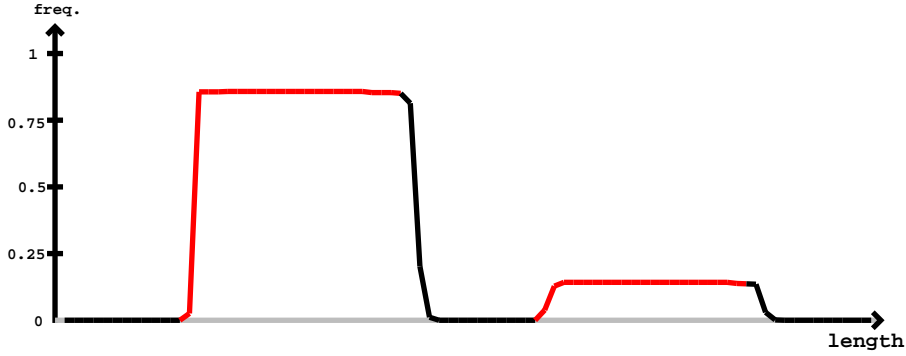

hsa-miR-34b-3p

| hsa-miR-34b-5p |                                                                                                  | reads | mm  | sample |
|----------------|--------------------------------------------------------------------------------------------------|-------|-----|--------|
| 5' -           | gugcucgguuuugaggcagugucuauuagcugauuguacuguggguuacaaucaacuacuccacugccaucaaaacaaggcac              | -3'   | exp |        |
|                | (((((((((((((((((((((((((((((((((((((((((((((((((((((((((((((((((((((((((((((((((((((((((((((((( |       |     |        |
|                | .....uaggcagugucuauuagcug.....                                                                   | 2     | 0   | seq    |
|                | .....uaggcagugucuauuagcugauu.....                                                                | 1     | 0   | seq    |
|                | .....uaggcagugucuauuagcugauug.....                                                               | 3     | 0   | seq    |
|                | .....Caggcagugucuauuagcugauug.....                                                               | 1     | 1   | seq    |
|                | .....uaggcagugucuauuagcugauugu.....                                                              | 7     | 0   | seq    |
|                | .....uaggcagugucuauuagcugauugua.....                                                             | 3     | 0   | seq    |
|                | .....uaggcagugucuauuagcugauuguaU.....                                                            | 1     | 1   | seq    |
|                | .....aggcagugucuauuagcug.....                                                                    | 1     | 0   | seq    |
|                | .....aggcagugucuauuagcugauu.....                                                                 | 1     | 0   | seq    |
|                | .....aggcagugucuauuagcugauug.....                                                                | 21    | 0   | seq    |
|                | .....aggcagGgucuauuagcugauug.....                                                                | 1     | 1   | seq    |
|                | .....aggcagugucuauuagcugauugu.....                                                               | 415   | 0   | seq    |
|                | .....aggcagugucuauuagcugauuAu.....                                                               | 1     | 1   | seq    |
|                | .....aggcagugucuauuagcugauugu.....                                                               | 1     | 1   | seq    |
|                | .....aggcagugucuauuagcugauugu.....                                                               | 1     | 1   | seq    |
|                | .....aggcagugucuauuagcugauugu.....                                                               | 2     | 1   | seq    |
|                | .....aggcagugucuauuagcugauugu.....                                                               | 2     | 1   | seq    |
|                | .....aggcagugucuauuagcugauuguC.....                                                              | 1     | 1   | seq    |
|                | .....aggcagugucuauuagcugauuguU.....                                                              | 8     | 1   | seq    |
|                | .....aggcagCgucuauuagcugauugu.....                                                               | 1     | 1   | seq    |
|                | .....aggcagugucuauuagcugauugu.....                                                               | 121   | 0   | seq    |
|                | .....aggcagugucuauuagcugauuguA.....                                                              | 2     | 1   | seq    |
|                | .....aggcagugucuauuagcugauuguU.....                                                              | 5     | 1   | seq    |
|                | .....cagugucuauuagcugauugu.....                                                                  | 1     | 0   | seq    |
|                | .....cauacuaaaccucacugcc.....                                                                    | 2     | 0   | seq    |
|                | .....cauacuaaaccucacugccU.....                                                                   | 1     | 1   | seq    |
|                | .....cauacuaaaccucacugccau.....                                                                  | 1     | 0   | seq    |
|                | .....cauacuaaaccucacugccauc.....                                                                 | 18    | 0   | seq    |
|                | .....cauacuaaaccucacugccauU.....                                                                 | 3     | 1   | seq    |
|                | .....cauacuaaaccucacugccauca.....                                                                | 1     | 0   | seq    |
|                | .....cauacuaaaccucacugccaucU.....                                                                | 1     | 1   | seq    |
|                | .....aaucauaaaccucacugcc.....                                                                    | 1     | 0   | seq    |
|                | .....aaucauaaaccucacugccauU.....                                                                 | 2     | 1   | seq    |
|                | .....aaucauaaaccucacugccauc.....                                                                 | 46    | 0   | seq    |

hsa-miR-34b-3p

hsa-miR-34b-5p

gugcucgguuuguaggcagugucauuagcugauuguacuguggguua**caauca**cuaacuccacugccaucaaaacaaggcac

|                                                     |    |   |     |
|-----------------------------------------------------|----|---|-----|
| .....aauca <u>cu</u> a <u>acuccacugccau</u> U.....  | 13 | 1 | seq |
| .....aauca <u>cu</u> a <u>acuccacugccau</u> ca..... | 1  | 0 | seq |
| .....auca <u>cu</u> a <u>acuccacugccau</u> c.....   | 5  | 0 | seq |
| .....auca <u>cu</u> a <u>acuccacugccau</u> ca.....  | 4  | 0 | seq |
| .....auca <u>cu</u> a <u>acuccacugccau</u> ca.....  | 1  | 0 | seq |

Cell line : NHOST differentiated  
 miRBase precursor : hsa-mir-34b  
 Total read count : 35  
 hsa-miR-34b-3p read count : 2  
 hsa-miR-34b-5p read count : 33  
 remaining reads : 0

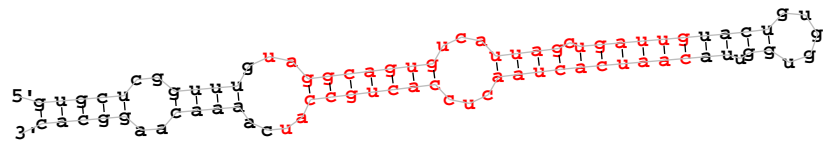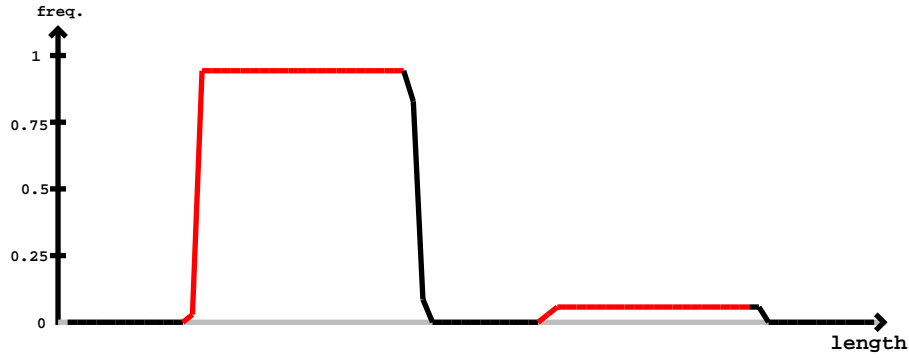

hsa-miR-34b-3p

hsa-miR-34b-5p

| 5'   | seq                                                                                       | 3'  | exp   | reads | mm     | sample |
|------|-------------------------------------------------------------------------------------------|-----|-------|-------|--------|--------|
| 5' - | gugcucgguuuuuaggcagugucauuagcugauuguacuguggguua <u>caaucacuaacuccacugcca</u> caaaaagggcac | -3' | exp   |       |        |        |
|      | (((((.....(((.....(((.....(((.....))))))))).....)))))).....))))                           |     | reads | mm    | sample |        |
|      | .....uaggcagugucauuagcugauug.....                                                         |     | 1     | 0     | seq    |        |
|      | .....aggcagugucauuagcugauug.....                                                          |     | 3     | 0     | seq    |        |
|      | .....aggcagugucauuagcugauugu.....                                                         |     | 26    | 0     | seq    |        |
|      | .....aggcagugucauuagcugauugua.....                                                        |     | 3     | 0     | seq    |        |
|      | .....caaucacuaacuccacugccauc.....                                                         |     | 1     | 0     | seq    |        |
|      | .....aaucaacuaacuccacugccauc.....                                                         |     | 1     | 0     | seq    |        |



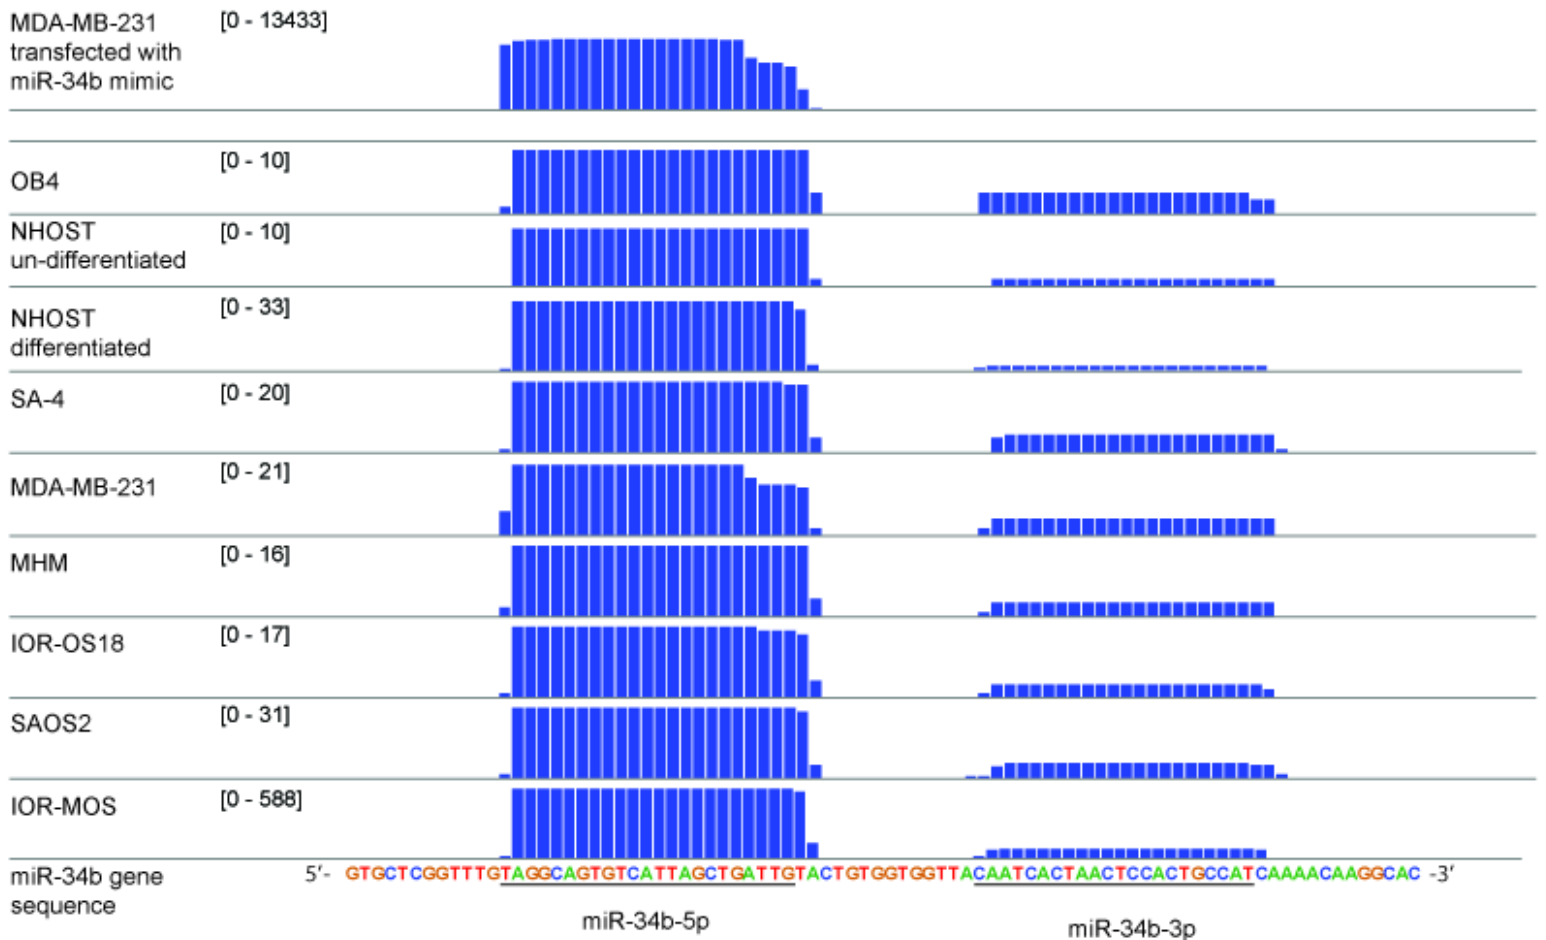

**Supplementary data S7: Raw sequencing reads of mature miR-34b from both non-malignant and malignant cells.**

Bars indicating the percentage of reads for the individual bases in the miR-34b gene sequence, obtained from raw sequencing data of MDA-MB-231 and noncancerous mesenchymal stromal cells (NHOST) before and after osteogenic differentiation, osteoblast primary culture (OB4), and liposarcoma (SA-4) and osteosarcoma cell lines (MHM, IOR-OS18, SAOS2, IOR-MOS). The annotated sequence is underscored. The numbers in brackets represent the number of total reads for each cell line.
